# Supplementary material for: Application of a Novel Biosensor for Salivary Conductivity in Detecting Chronic Kidney Disease
Source: MDPI journal article supplement (doi:10.3390/bios12030178), 2022-03-17
Supplement: s1 [file s1]

## Supplemental Materials

C-W Lin, Y-H Tsai and Y-P Lu, et al. Application of a Novel Biosensor for Salivary Conductivity in Detecting Chronic Kidney Disease

### Content

**Table S1.** Co-linearity analysis of covariates put into the multivariate linear regression models.

**Table S2-1.** Characteristics of study populations without histories of diabetes and hypertension.

**Table S2-2.** Logistic regression analyses for the risk of chronic kidney disease in study populations without histories of diabetes and hypertension.

**Table S3-1.** Population characteristics in the propensity-score matched dataset.

**Table S3-2.** Logistic regression analyses for the risk of chronic kidney disease in the propensity-score matched dataset.

**Figure S1.** Conductance measurement of human saliva samples at different times.

**Table S1.** Co-linearity analysis of covariates put into the multivariate linear regression models.

|                         | <i>t</i> | Sig.   | Collinearity statistics |       |
|-------------------------|----------|--------|-------------------------|-------|
|                         |          |        | Tolerance               | VIF   |
| <b>Model 1</b>          |          |        |                         |       |
| Constant                | 1.064    | 0.289  |                         |       |
| Age                     | 4.153    | <0.001 | 0.745                   | 1.342 |
| Systolic blood pressure | 0.929    | 0.354  | 0.880                   | 1.137 |
| BUN                     | -0.791   | 0.430  | 0.613                   | 1.632 |
| Fasting glucose         | 2.229    | 0.027  | 0.994                   | 1.006 |
| Creatinine              | 2.288    | 0.023  | 0.656                   | 1.525 |
| <b>Model 2</b>          |          |        |                         |       |
| Constant                | 2.915    | 0.004  |                         |       |
| Age                     | 3.358    | <0.001 | 0.679                   | 1.473 |
| Systolic blood pressure | 1.007    | 0.315  | 0.884                   | 1.132 |
| BUN                     | -0.922   | 0.358  | 0.629                   | 1.589 |
| Fasting glucose         | 2.066    | 0.040  | 0.995                   | 1.005 |
| eGFR                    | -2.661   | 0.008  | 0.574                   | 1.743 |

Abbreviations: BUN, blood urea nitrogen; eGFR, estimated glomerular filtration rate; VIF, the variance inflation factor

**Table S2-1.** Characteristics of study populations without histories of diabetes and hypertension.

|                                               | Low salivary<br>conductivity group*<br>(N=96) | High salivary<br>conductivity group<br>(N=40) | <i>p</i> value     |
|-----------------------------------------------|-----------------------------------------------|-----------------------------------------------|--------------------|
| <b>Salivary conductivity, ms/cm</b>           | 4.86±1.00                                     | 7.96±1.06                                     | <0.01 <sup>#</sup> |
| <b>Demographics</b>                           |                                               |                                               |                    |
| Age, years                                    | 58.48±14.83                                   | 70.93±12.22                                   | <0.01 <sup>#</sup> |
| Gender (male), n (%)                          | 31 (32.3)                                     | 18 (45.0)                                     | 0.16               |
| Body weight, kg                               | 60.07±11.15                                   | 62.88±11.70                                   | 0.70               |
| Body height, cm                               | 159.55±7.79                                   | 160.26±8.26                                   | 0.63               |
| Body mass index, kg/m <sup>2</sup>            | 24.31±3.38                                    | 24.43±3.76                                    | 0.85               |
| Systolic blood pressure, mmHg                 | 125.23±18.62                                  | 131.98±20.13                                  | 0.06               |
| Diastolic blood pressure, mmHg                | 74.53±10.68                                   | 74.83±11.32                                   | 0.89               |
| <b>Comorbid conditions, n (%)<sup>@</sup></b> |                                               |                                               |                    |
| Chronic kidney disease                        | 1 (1.0)                                       | 2 (5.1)                                       | 0.14               |
| Ischemic heart disease/ Stroke                | 3 (3.1)                                       | 3 (7.7)                                       | 0.24               |
| Dyslipidemia                                  | 7 (7.3)                                       | 1 (2.5)                                       | 0.28               |
| Gout                                          | 2 (2.1)                                       | 2 (5.1)                                       | 0.34               |
| Chronic liver disease                         | 8 (8.3)                                       | 3 (7.7)                                       | 0.90               |
| <b>Laboratory parameters</b>                  |                                               |                                               |                    |
| BUN, mg/dL                                    | 13.84±4.25                                    | 17.39±5.72                                    | <0.01 <sup>#</sup> |
| Creatinine, mg/dL                             | 0.75±0.22                                     | 0.91±0.34                                     | <0.01 <sup>#</sup> |
| eGFR, mL/min/1.73 m <sup>2</sup>              | 93.66±19.81                                   | 77.98±21.81                                   | <0.01 <sup>#</sup> |
| Serum osmolality, mOsm/kgH <sub>2</sub> O     | 286.33±4.55                                   | 289.15±5.31                                   | <0.01 <sup>#</sup> |
| Fasting glucose, mg/dL                        | 98.13±27.48                                   | 102.58±13.28                                  | 0.33               |
| Hemoglobin A1c, %                             | 5.75±1.06                                     | 5.71±0.41                                     | 0.81               |
| ALT, U/L                                      | 22.05±21.58                                   | 22.08±10.66                                   | 0.58               |
| Triglyceride, mg/dL                           | 100.86±59.54                                  | 126.10±119.32                                 | 0.21               |
| Total cholesterol, mg/dL                      | 199.81±31.94                                  | 204.05±43.63                                  | 0.53               |
| LDL-C, mg/dL                                  | 122.56±27.25                                  | 124.68±35.57                                  | 0.71               |
| HDL-C, mg/dL                                  | 57.02±13.34                                   | 55.10±14.15                                   | <b>0.45</b>        |

Values are expressed as mean ± standard deviation or number (percentage).

\* Study populations were stratified into low and high groups according to the cutoff value of salivary conductivity (6.59 ms/m).

@ The information of comorbid conditions was obtained by questionnaires.

# indicates *p* value < 0.05.

**Table S2-2.** Logistic regression analyses for the risk of chronic kidney disease in study populations without histories of diabetes and hypertension.

|                        | Odds ratio (95% CI)               |                                   |                                   |
|------------------------|-----------------------------------|-----------------------------------|-----------------------------------|
|                        | Univariate                        | Multivariate                      |                                   |
|                        |                                   | Model 1                           | Model 2                           |
| Salivary conductivity* |                                   |                                   |                                   |
| High                   | 5.75 <sup>#</sup><br>(1.62-20.39) | 5.12 <sup>#</sup><br>(1.39-18.86) | 4.71 <sup>#</sup><br>(1.24-17.84) |
| Low                    | (Ref)                             | (Ref)                             | (Ref)                             |

Abbreviations: CI, confidence interval; Ref, reference  
\* Salivary conductivity here is a dichotomous variable by the cutoff value of 6.59 ms/m.  
Model 1: adjusted for age, and gender  
Model 2: adjusted for age, gender, and history of dyslipidemia  
# indicates p value < 0.05.

**Table S3-1.** Population characteristics in the propensity-score matched dataset.

|                                               | Low salivary<br>conductivity group*<br>(N=74) | High salivary<br>conductivity group<br>(N=74) | <i>p</i> value     |
|-----------------------------------------------|-----------------------------------------------|-----------------------------------------------|--------------------|
| <b>Salivary conductivity, ms/cm</b>           | 4.93±1.02                                     | 7.94±1.02                                     | <0.01 <sup>#</sup> |
| <b>Demographics</b>                           |                                               |                                               |                    |
| Age, years                                    | 67.61±9.36                                    | 69.92±10.93                                   | 0.17               |
| Gender (male), n (%)                          | 26 (35.1)                                     | 29 (39.2)                                     | 0.61               |
| Body weight, kg                               | 63.74±11.44                                   | 63.35±11.21                                   | 0.83               |
| Body height, cm                               | 158.05±8.14                                   | 158.76±8.24                                   | 0.60               |
| Body mass index, kg/m <sup>2</sup>            | 25.44±3.50                                    | 25.07±3.40                                    | 0.51               |
| Systolic blood pressure, mmHg                 | 134.68±20.23                                  | 135.68±21.91                                  | 0.77               |
| Diastolic blood pressure, mmHg                | 75.26±12.28                                   | 76.14±12.16                                   | 0.66               |
| <b>Comorbid conditions, n (%)<sup>@</sup></b> |                                               |                                               |                    |
| Diabetes mellitus                             | 11 (14.9)                                     | 15 (20.3)                                     | 0.39               |
| Hypertension                                  | 33 (44.6)                                     | 26 (35.1)                                     | 0.24               |
| Chronic kidney disease                        | 0 (0)                                         | 2 (2.7)                                       | 0.15               |
| Ischemic heart disease/ Stroke                | 5 (6.8)                                       | 9 (12.3)                                      | 0.25               |
| Dyslipidemia                                  | 18 (24.3)                                     | 10 (13.7)                                     | 0.09               |
| Gout                                          | 4 (5.4)                                       | 5 (6.8)                                       | 0.73               |
| Chronic liver disease                         | 12 (16.2)                                     | 8 (11.0)                                      | 0.35               |
| <b>Laboratory parameters</b>                  |                                               |                                               |                    |
| BUN, mg/dL                                    | 14.85±4.94                                    | 16.97±5.78                                    | 0.02               |
| Creatinine, mg/dL                             | 0.76±0.17                                     | 0.90±0.30                                     | <0.01 <sup>#</sup> |
| eGFR, mL/min/1.73 m <sup>2</sup>              | 88.46±19.79                                   | 77.17±21.27                                   | <0.01 <sup>#</sup> |
| Serum osmolality, mOsm/kgH <sub>2</sub> O     | 288.35±5.07                                   | 288.69±6.15                                   | 0.72               |
| Fasting glucose, mg/dL                        | 102.81±22.90                                  | 108.16±20.34                                  | 0.14               |
| Hemoglobin A1c, %                             | 5.94±0.85                                     | 5.97±0.83                                     | 0.88               |
| ALT, U/L                                      | 21.39±9.80                                    | 20.62±9.74                                    | 0.63               |
| Triglyceride, mg/dL                           | 120.77±71.26                                  | 123.95±92.62                                  | 0.82               |
| Total cholesterol, mg/dL                      | 197.72±39.20                                  | 200.15±45.37                                  | 0.73               |
| LDL-C, mg/dL                                  | 118.38±33.88                                  | 122.05±38.65                                  | 0.54               |
| HDL-C, mg/dL                                  | 55.01±13.39                                   | 53.84±13.89                                   | <b>0.60</b>        |

Values are expressed as mean ± standard deviation or number (percentage).

\* Study populations were stratified into low and high groups according to the cutoff value of salivary conductivity (6.59 ms/m).

@ The information of comorbid conditions was obtained by questionnaires.

# indicates *p* value < 0.05.

**Table S3-2.** Logistic regression analyses for the risk of chronic kidney disease in the propensity-score matched dataset.

|                        | Odds ratio (95% CI)   |                       |                       |
|------------------------|-----------------------|-----------------------|-----------------------|
|                        | Univariate            | Multivariate          |                       |
|                        |                       | Model 1               | Model 2               |
| Salivary conductivity* |                       |                       |                       |
| High                   | 5.52#<br>(1.52-20.13) | 4.63#<br>(1.05-21.10) | 4.47#<br>(1.01-20.78) |
| Low                    | (Ref)                 | (Ref)                 | (Ref)                 |

Abbreviations: CI, confidence interval; Ref, reference  
 \* Salivary conductivity here is a dichotomous variable by the cutoff value of 6.59 ms/m.  
 Model 1: adjusted for age, and gender  
 Model 2: adjusted for age, gender, and histories of diabetes, hypertension, or dyslipidemia  
 # indicates p value < 0.05.

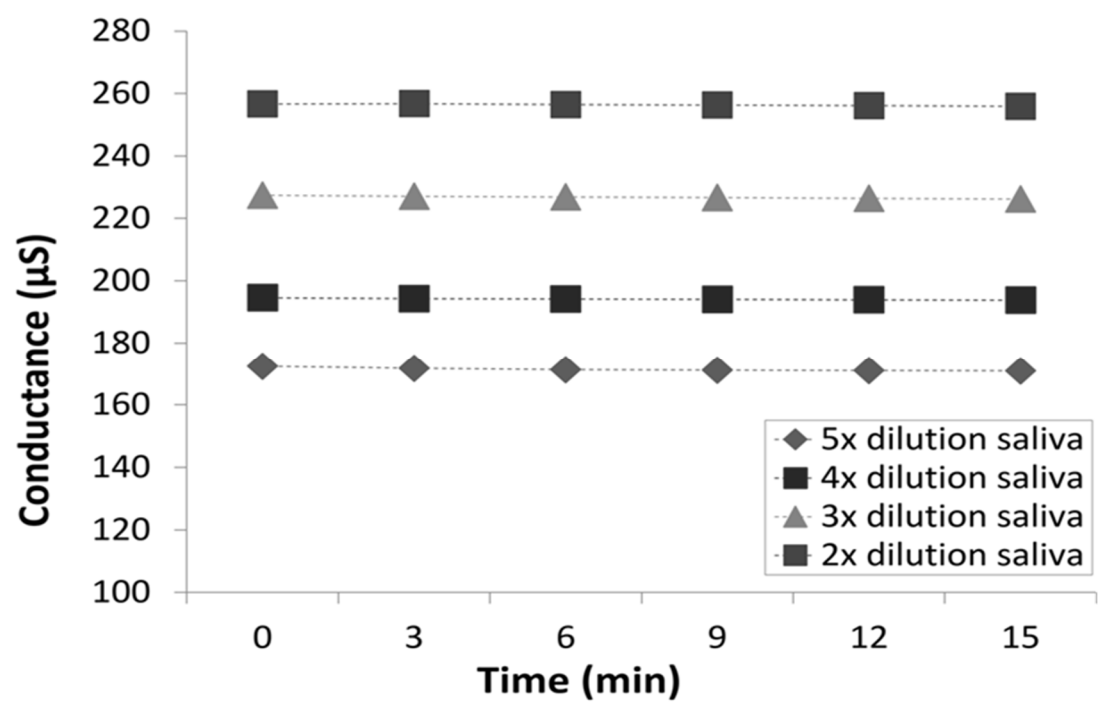

**Figure S1** Conductance measurement of human saliva samples at different times.
